# Supplementary material for: Methane-Derived Authigenic Carbonates on the Seafloor of the Laptev Sea Shelf
Source: Frontiers journal article supplement (doi:10.3389/fmars.2021.690304), 2021-07-28
Supplement: Data_Sheet_4.PDF [file Data_Sheet_4.PDF]

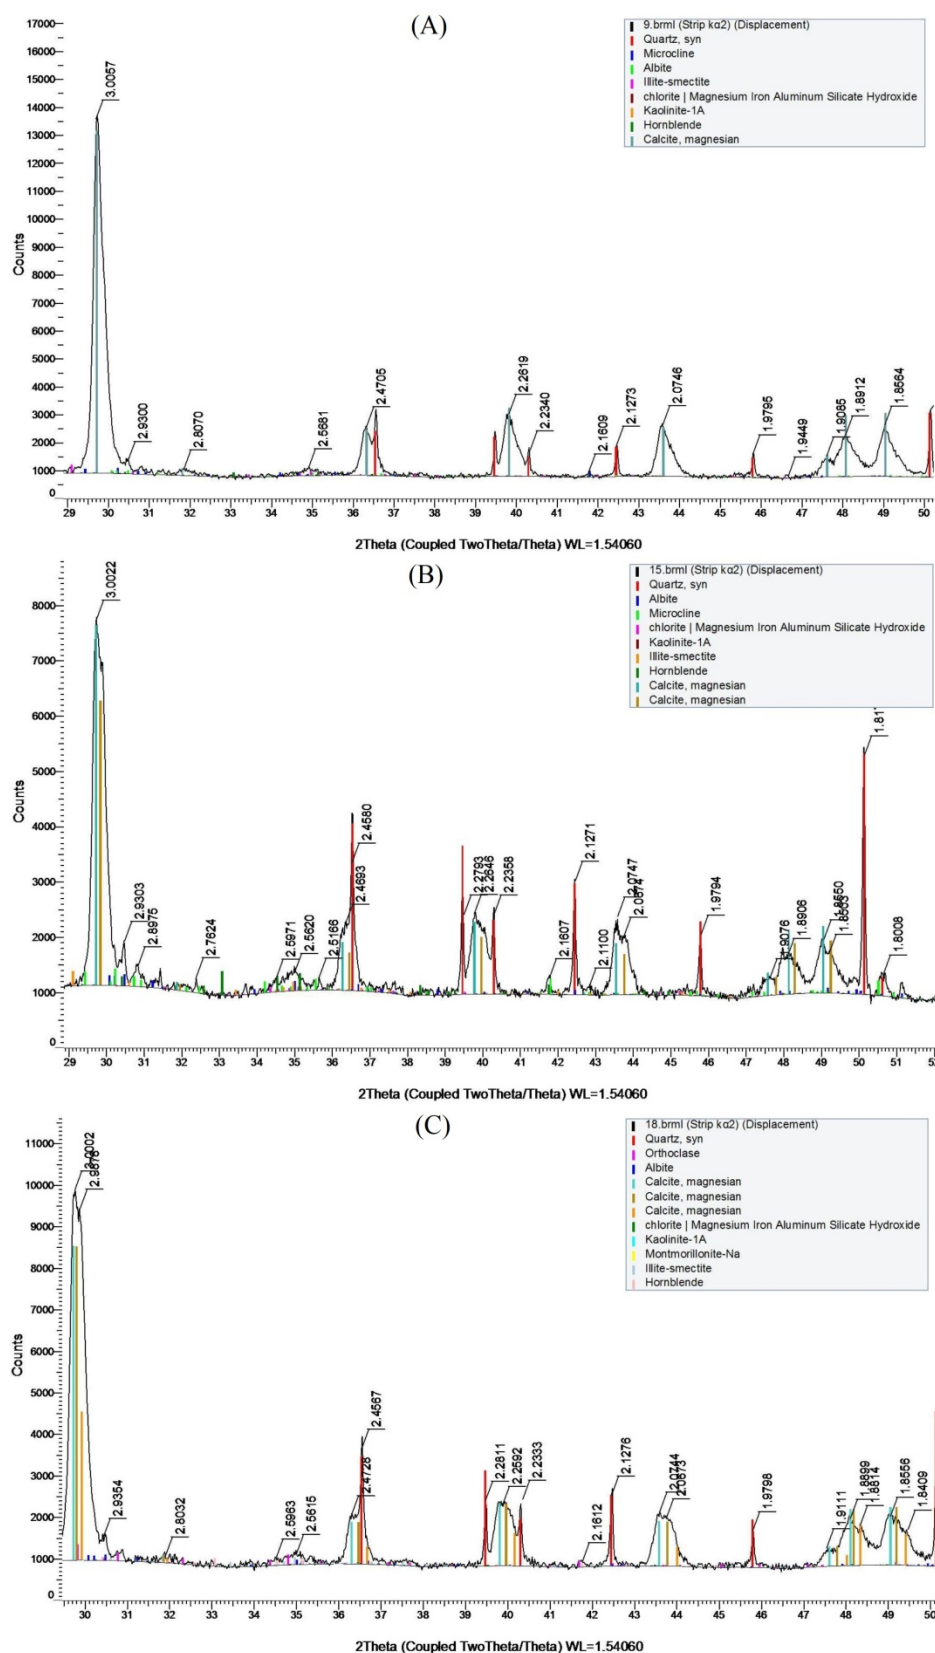

**Supplementary Figure 4.** Fragments of XRD diffractograms of the crust (sample OD-I-1) with one (A), two (B), and three (C) main identifiable phases of Mg-calcite.
